# Supplementary material
Source: PubMed Central journal article supplement (PMC3635066)
Supplement: NIHMS405746-supplement-1_si_001.pdf [file NIHMS405746-supplement-1_si_001.pdf]

## Supporting Information

### Selective and potent urea inhibitors of *Cryptosporidium parvum* inosine 5'-monophosphate dehydrogenase

*Suresh Kumar Gorla, Mandapati Kavitha, Minjia Zhang, Xiaoping Liu, Lisa Sharling, Deviprasad R. Gollapalli, Boris Striepen, Lizbeth Hedstrom, Gregory D. Cuny*

#### Table of Contents:

|                                      |       |
|--------------------------------------|-------|
| 1) HPLC Method                       | S2    |
| 2) HPLC Method and purity assessment | S2-S3 |

HPLC purity assessments

Instrument: Agilent 1100

Column: Zorbax® SB-C8 column, 30 x 4.6 mm, 3.5 µm

Injection volume: 5 µL

Sample concentration: 1 -2 mg/mL in 100 % acetonitrile

λ: 254 nm

Elution solvent: 5 % acetonitrile and 95 % water (both solvents contain 0.1 % trifluoroacetic acid) with a total run time of 2.5 min.

Elution rate: 3.0 mL/min

| <b>Compound</b> | <b>Retention time (min)</b> | <b>Purity (%)</b> |
|-----------------|-----------------------------|-------------------|
| 5a              | 1.83                        | 98                |
| 5b              | 1.83                        | 98                |
| 5c              | 1.69                        | 98                |
| 5d              | 1.84                        | 98                |
| 5e              | 1.65                        | 98                |
| 5f              | 1.58                        | 97                |
| 5g              | 1.97                        | 98                |
| 5h              | 1.91                        | 98                |
| 5i              | 1.74                        | 97                |
| 5j              | 1.84                        | 98                |
| 5k              | 1.54                        | 98                |
| 5l              | 1.59                        | 98                |
| 5m              | 1.22                        | 97                |
| 5n              | 1.57                        | 96                |
| 5o              | 1.86                        | 98                |
| 5p              | 1.66                        | 97                |
| 5q              | 1.50                        | 97                |
| 5r              | 1.34                        | 98                |
| 5s              | 1.39                        | 96                |
| 5t              | 1.50                        | 97                |
| 5u              | 1.32                        | 98                |
| 6a              | 1.80                        | 98                |
| 6b              | 1.62                        | 98                |
| 6c              | 1.60                        | 97                |
| 7a              | 1.55                        | 98                |
| 7b              | 1.54                        | 98                |
| 7c              | 1.61                        | 97                |

---

|            |      |    |
|------------|------|----|
| <b>7d</b>  | 1.61 | 98 |
| <b>7e</b>  | 1.78 | 98 |
| <b>8a</b>  | 1.70 | 97 |
| <b>8b</b>  | 1.68 | 98 |
| <b>8c</b>  | 1.80 | 97 |
| <b>9</b>   | 1.44 | 96 |
| <b>10</b>  | 1.68 | 98 |
| <b>11</b>  | 1.96 | 98 |
| <b>17</b>  | 1.52 | 98 |
| <b>23</b>  | 1.43 | 98 |
| <b>25</b>  | 1.56 | 98 |
| <b>26</b>  | 1.46 | 97 |
| <b>28</b>  | 1.85 | 97 |
| <b>36a</b> | 1.46 | 98 |
| <b>36b</b> | 1.69 | 98 |
| <b>37</b>  | 1.40 | 97 |
| <b>38</b>  | 2.1  | 96 |

---
